# Supplementary material
Source: publisher figshare collection journal article supplement (https://frontiersin.figshare.com/ndownloader/files/34734694)
Supplement: Supplementary file [file 34734694]

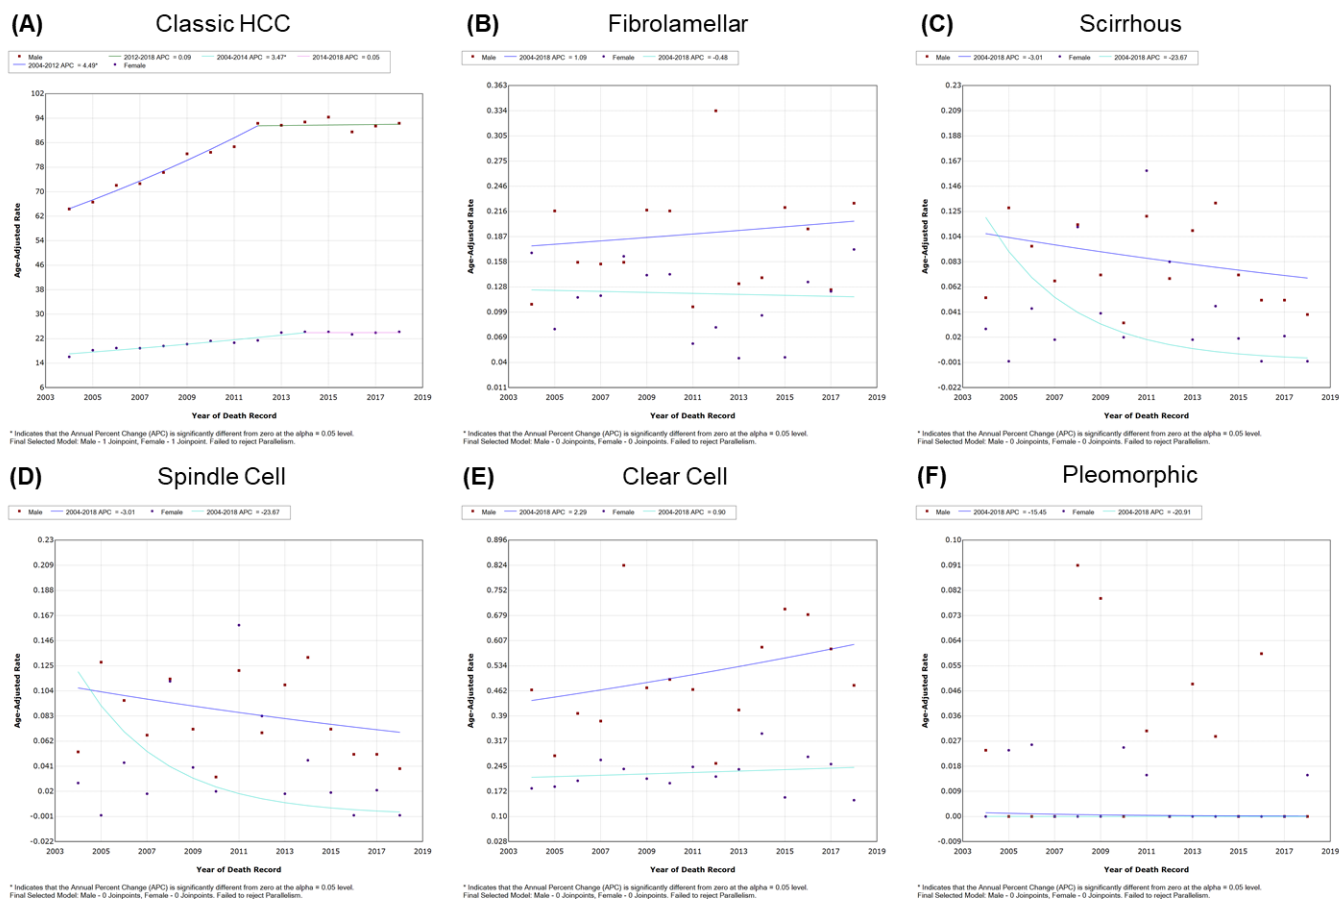

**Figure S2.** The variation trends for the gender-specific IBM of different pathological subtypes of HCC from 2004 to 2018. **(A)** Classic HCC; **(B)** Fibrolamellar carcinoma; **(C)** Scirrhou carcinoma; **(D)** Spindle cell carcinoma; **(E)** Clear cell carcinoma; **(F)** Pleomorphic carcinoma.

IBM, Incidence-based mortality; HCC, Hepatocellular carcinoma.
